# Supplementary material for: Simultaneous elimination of toxic dyes, ciprofloxacin and Cr(vi) contents from polluted water: escalating surface plasmon electrons of Ag cocatalysts on BiVO4 microstructures
Source: Royal Society of Chemistry journal article supplement (doi:10.1039/d3ew00368j), 2023-01-01
Supplement: d3ew00368j1.pdf [file d3ew00368j1.pdf]

## Supporting information

### Simultaneous elimination of toxic dyes, ciprofloxacin and Cr (VI) contents from polluted water: Escalating Surface plasmon electrons of Ag cocatalysts on BiVO<sub>4</sub> microstructures†

Muhammad Zeeshan Abid<sup>a</sup>, Asfa Ilyas<sup>a</sup>, Khezina Rafiq<sup>a\*</sup>, Abdul Rauf<sup>a</sup>, Muhammad Arif Nadeem<sup>b</sup>, Amir Waseem<sup>b</sup>, Ejaz Hussain<sup>ab\*</sup>

<sup>a</sup>Institute of Chemistry, Inorganic Materials Laboratory 52S, The Islamia University of Bahawalpur-63100, Pakistan

<sup>b</sup>Catalysis and Nanomaterials Lab 27, Department of Chemistry, Quaid-i-Azam University, Islamabad 45320, Pakistan

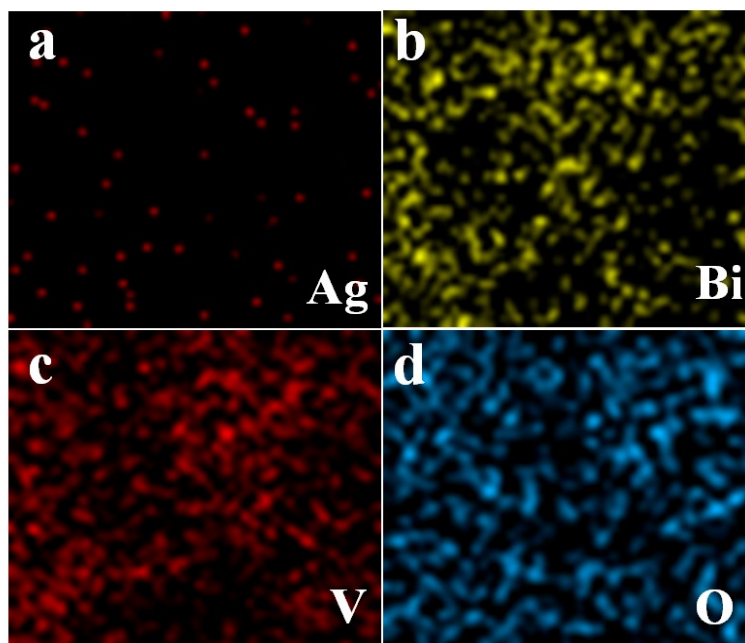

**Figure S1:** Elemental mapping of Ag-BiVO<sub>4</sub>.

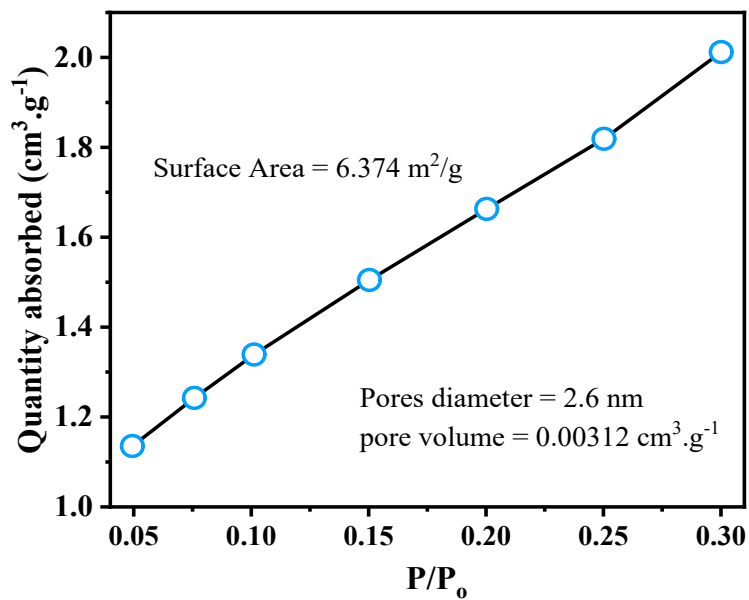

**Figure S2:** BET, N<sub>2</sub> adsorption-desorption isotherm.

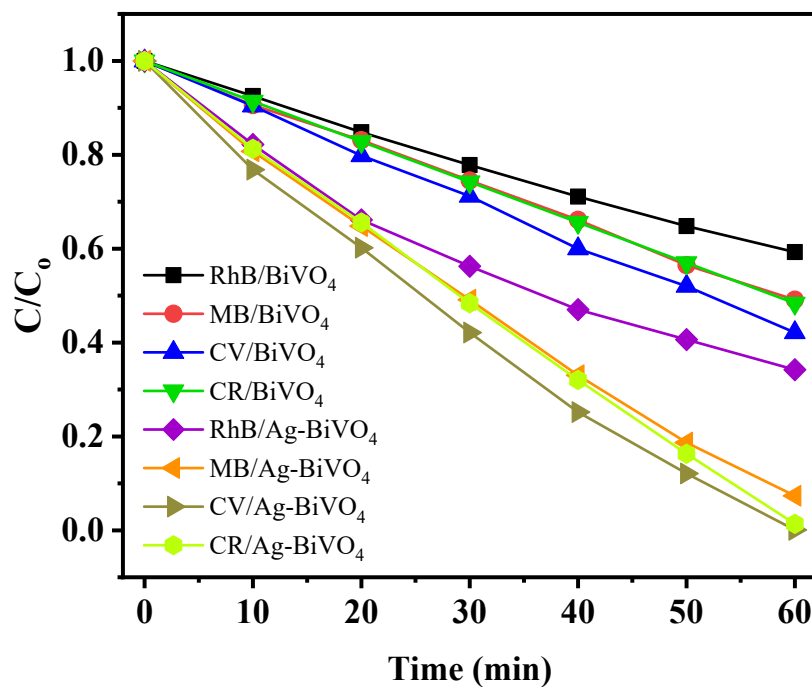

**Figure S3:** Comparison of RhB, MB, CV and CR dyes degradation with BiVO<sub>4</sub> and Ag-BiVO<sub>4</sub> photocatalysts.

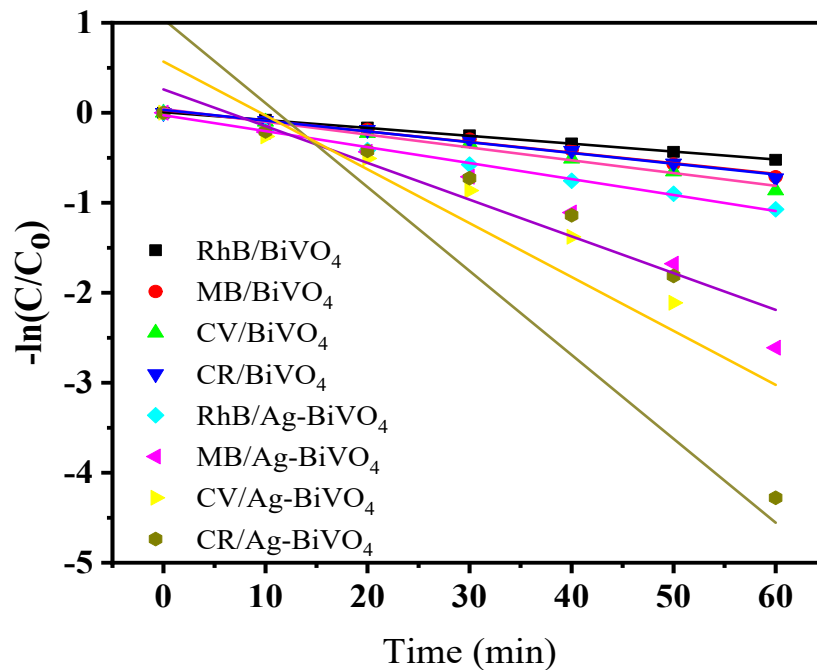

**Figure S4:** Reaction rates of RhB, MB, CV and CR dyes degradation with BiVO<sub>4</sub> and Ag-BiVO<sub>4</sub> photocatalysts.

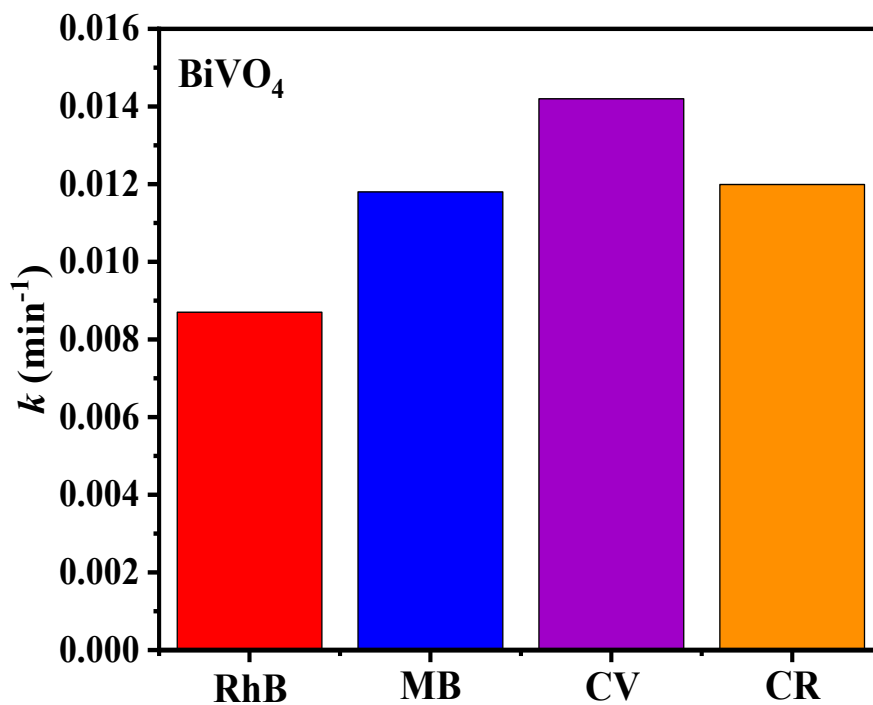

**Figure S5:** Comparisons of reaction rates of RhB, MB, CV and CR dyes degradation with BiVO<sub>4</sub>

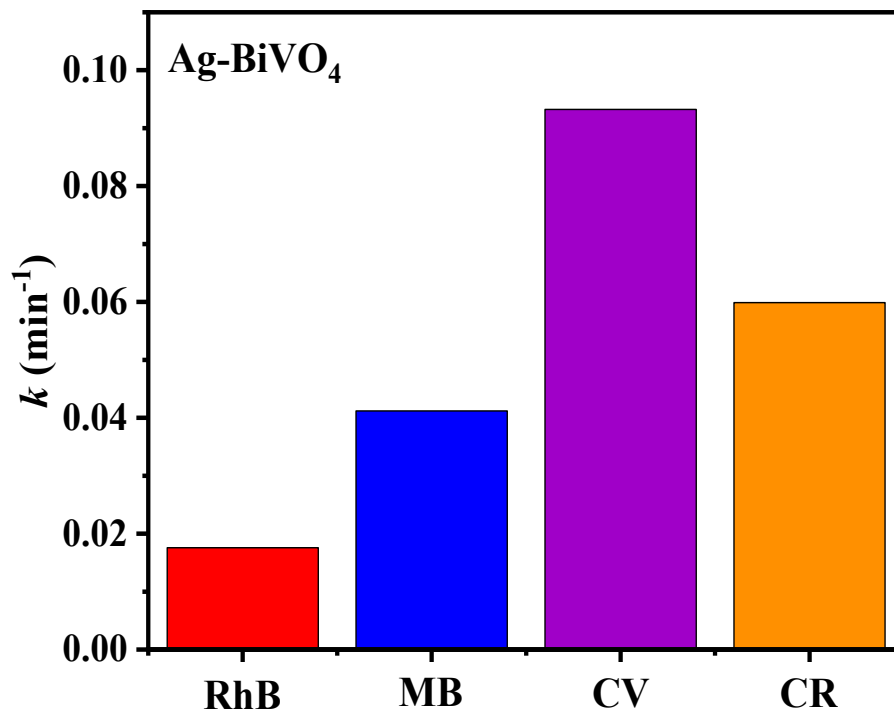

**Figure S6:** Comparisons of reaction rates of RhB, MB, CV and CR dyes degradation with Ag-BiVO<sub>4</sub>

**Table S1:** Physical properties of Methylene Blue

| Parameters       | Values                                              |
|------------------|-----------------------------------------------------|
| Chemical formula | C <sub>16</sub> H <sub>18</sub> ClN <sub>3</sub> S  |
| Molar Mass       | 319.85 g/mol                                        |
| Appearance       | Dark green crystals but appears blue when dissolve  |
| Melting point    | 100-110 °C                                          |
| Other name       | Basic blue 9                                        |
| $\lambda_{max}$  | 664 nm                                              |
| IUPAC name       | 3,7-bis(Dimethylamino)-phenothiazine-5-ium chloride |

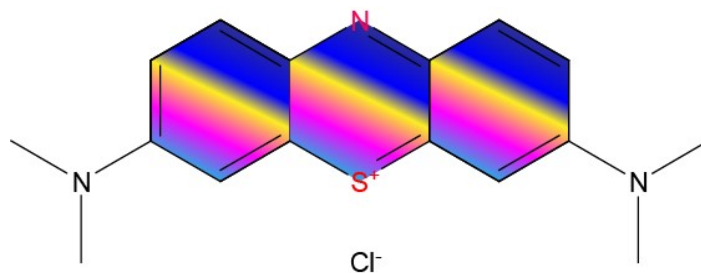

**Figure S7:** Structure of Methylene Blue

**Table S2: Physical properties of Rhodamine B**

| Parameters       | Values                                                                         |
|------------------|--------------------------------------------------------------------------------|
| Chemical formula | $C_{28}H_{31}ClN_2O_3$                                                         |
| Molar Mass       | 479.02 g/mol                                                                   |
| Appearance       | Red to violet powder                                                           |
| Melting point    | 210-211 °C                                                                     |
| Other name       | Rhodamine 610, Pigment violet 1, Basic violet 10                               |
| $\lambda_{max}$  | 554 nm                                                                         |
| IUPAC name       | 9-(2-Carboxyphenyl)-6-(diethylamino)-N,N-diethyl-3H-xanthen-3-iminium chloride |

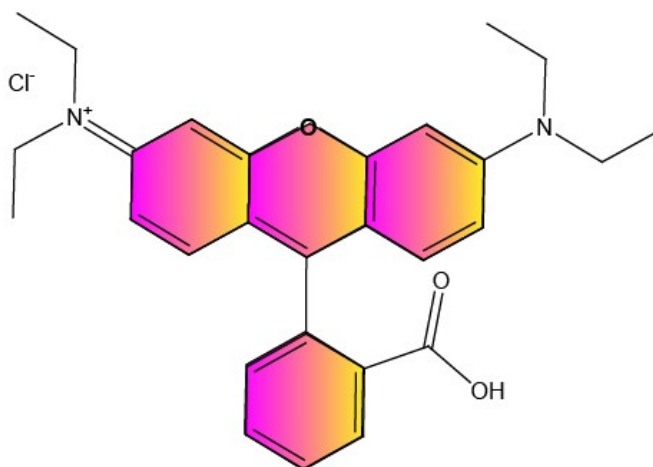**Figure S8:** Structure of Rhodamine B**Table S3: Physical properties of Congo red**

| Parameters       | Values                                                                                                               |
|------------------|----------------------------------------------------------------------------------------------------------------------|
| Chemical formula | $C_{32}H_{22}N_6Na_2O_6S_2$                                                                                          |
| Molar Mass       | 696.665 g/mol                                                                                                        |
| Appearance       | Blue-violet at pH 3.0 and red at pH 5.0                                                                              |
| Melting point    | >360 °C                                                                                                              |
| $\lambda_{max}$  | 496 nm                                                                                                               |
| IUPAC name       | Disodium 4-amino-3-[4-[4-(1-amino-4-sulfonato-naphthalen-2-yl)diazenyl]phenyl]phenyl]diazenyl-naphthalen-1-sulfonate |

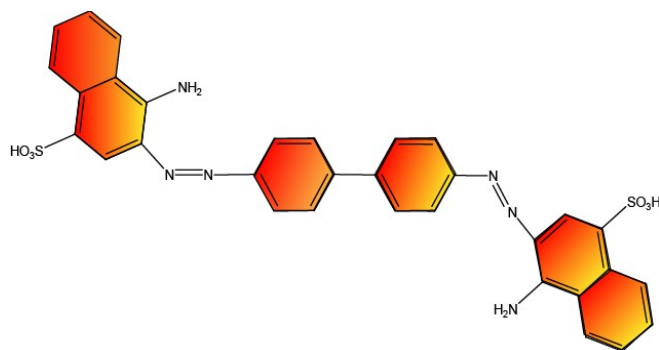

**Figure S9: Structure of Congo red**

**Table S4: Physical properties of Crystal Violet**

| Parameters       | Values                                                              |
|------------------|---------------------------------------------------------------------|
| Chemical formula | $C_{25}H_{30}ClN_3$                                                 |
| Molar Mass       | 407.99 g/mol                                                        |
| Appearance       | Dark green but appears purple when dissolve                         |
| Melting point    | 205 °C                                                              |
| Other name       | Gentian violet, Aniline violet, methyl violet 10B                   |
| $\lambda_{max}$  | 590 nm                                                              |
| IUPAC name       | 4-(4-dimethylaminophenyl)-4'-nitro-2,2'-dimethylazobenzene chloride |

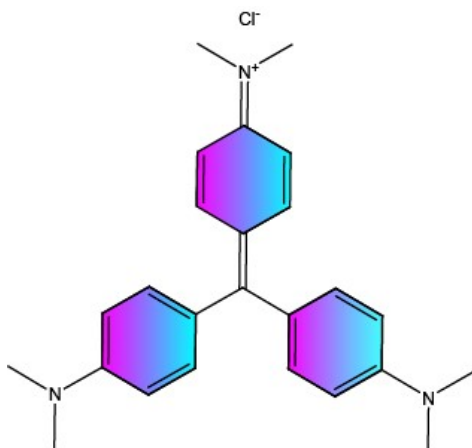

**Figure S10: Structure of Crystal Violet**

**Table S5: Physical properties of ciprofloxacin**

| Parameters       | Values                                                                   |
|------------------|--------------------------------------------------------------------------|
| Chemical formula | C <sub>17</sub> H <sub>18</sub> FN <sub>3</sub> O <sub>3</sub>           |
| Molar Mass       | 331.347 g/mol                                                            |
| Other names      | Ciloxan, Cipro, Neofloxin                                                |
| Melting point    | 581.8 °C                                                                 |
| Appearance       | Light yellow crystalline substance                                       |
| λ <sub>max</sub> | 273 nm                                                                   |
| IUPAC name       | 1-cyclopropyl-6-fluoro-4-oxo-7-piperazin-1-ylquinoline-3-carboxylic acid |

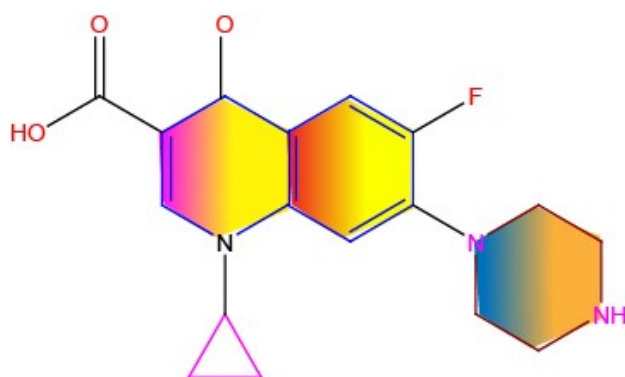**Figure S11: Structure of ciprofloxacin****Table S6: EDX analysis wt% of elements.**

| Element | Apparent Concentration | K ratio | Wt %  | Weight % Sigma |
|---------|------------------------|---------|-------|----------------|
| C       | 0.81                   | 0.00807 | 4.56  | 1              |
| O       | 6.23                   | 0.02098 | 16.68 | 1.32           |
| V       | 6.57                   | 0.06571 | 13.76 | 0.72           |
| Ag      | 0.94                   | 0.00943 | 2.19  | 0.83           |
| Au      | 0.41                   | 0.00412 | 1.10  | 0.38           |
| Bi      | 27.12                  | 0.26523 | 61.71 | 1.55           |
| Total:  |                        |         | 100   |                |

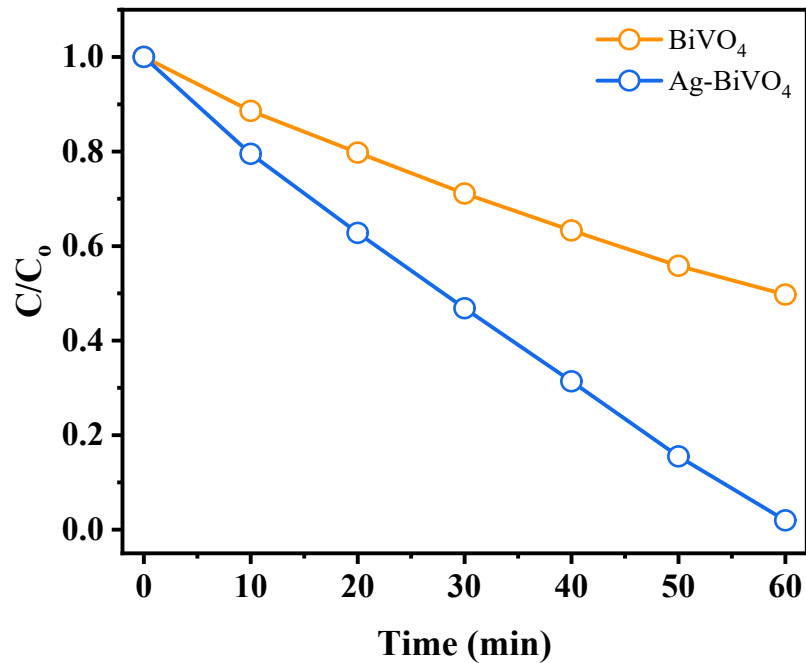

**Figure S12:** CIP degradation by using  $\text{BiVO}_4$  and  $\text{Ag-BiVO}_4$ .

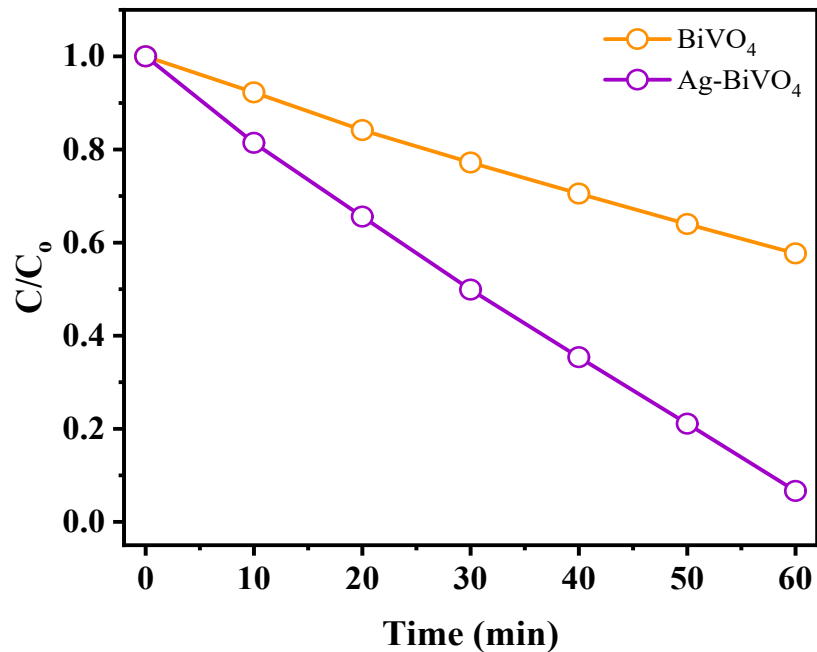

**Figure S13:** Cr (VI) reduction to Cr (III) by using  $\text{BiVO}_4$  and  $\text{Ag-BiVO}_4$ .



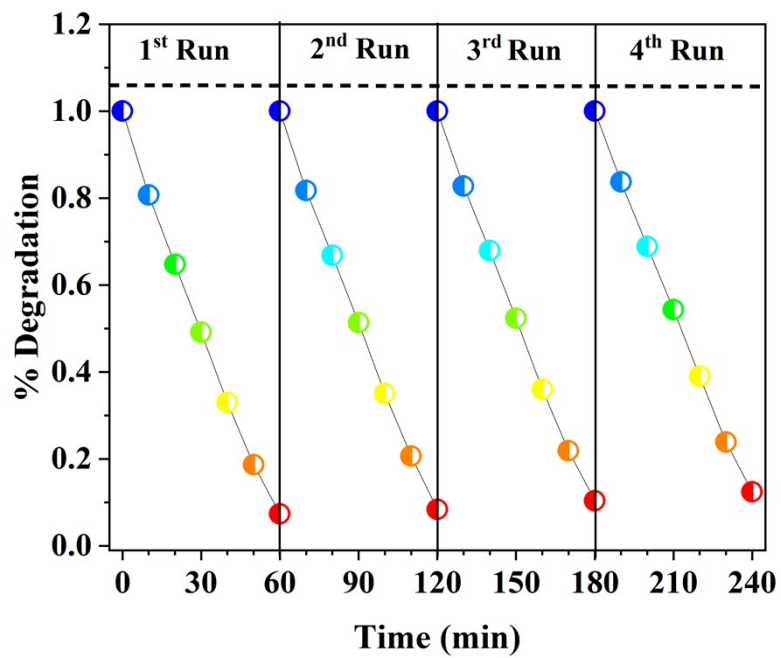

**Figure S14:** Recyclability of Ag-BiVO<sub>4</sub> for MB degradation.

### Effect of catalyst dose:

The impact of photocatalyst dosage on the degradation of MB was investigated using 5.0–25 mg of Ag-BiVO<sub>4</sub> photocatalyst. Each photoreaction was conducted for 60 min. With an increase in photocatalyst dosage, the degradation rate of MB also increased. This can be attributed to the amplified generation of  $\cdot\text{O}_2^-$  and  $\cdot\text{OH}$  radicals, resulting from a greater number of catalytically active sites created by the higher catalyst dosage. However, beyond 20 mg, there was a decline in the degradation rate due to excessive catalyst presence impeding light penetration. These findings are depicted in [Figure S15](#). Therefore, 20 mg was selected as the optimal catalyst dosage for the experiment.

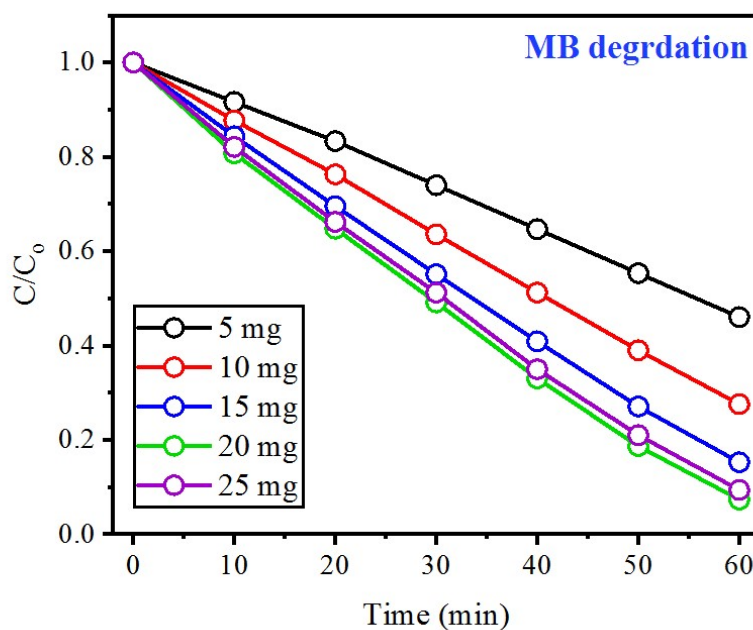

**Figure S15:** The influence of catalyst dose on the MB degradation via Ag-BiVO<sub>4</sub>

**Sampling from the Field Station:** The project was aimed to estimate and remove the hazardous pollutants from the drinking water obtained near to the industrial zones of Pakistan. For the purpose, 20 water samples were collected from the different industrial zones to estimate and remove pollutants (i.e. MB, RhB, CV CR, CIP and Cr(VI)). All collected samples were centrifuged at 5000 rpm for 10 min to remove the suspended particles. The absorbance of each sample was monitored at a UV-VIS spectrophotometer. Although there are various pollutants present but we have targeted the aforementioned pollutants which are present in high concentration and within the detection limit of available instruments. The measured absorption was compared with the standard chart to estimate the concentration of pollutants. The 50 mL of polluted water was treated with 10 mg of as-synthesized Ag-BiVO<sub>4</sub> for 10 min to degrade the pollutants. [Table S6](#) represents the estimation and removal of various pollutants collected from industrial drainage, canals, sewage water, and common reservoirs located near to the industrial zones namely Lahore, Faisalabad, Karachi, Multan and Islamabad zones. The survey results depicts that the drinking water collected to the side near to industrial drainage has higher concentrations of pollutants than the samples collected from other water sources of same zone. The detail survey depicts that, concentration of above pollutants in the Karachi industrial zone is high as compared to the other industrial zones of Pakistan.

**Table S7:** Pollutants degradation from water of various Zones of Pakistan using Ag-BiVO<sub>4</sub> catalyst.

| Location       | Code            | Water source        | Contaminants        | Conc. (ppm) | Abs*      | Abs**       | % Removal   | GPS (Meterk/Handheld-ZL-180) |             |             |     |
|----------------|-----------------|---------------------|---------------------|-------------|-----------|-------------|-------------|------------------------------|-------------|-------------|-----|
|                |                 |                     |                     |             |           |             |             | E°                           | N°          | Elev.       |     |
| Lahore Zone    | LH-1            | Industrial drainage | MB                  | 0.30–0.50   | 0.08      | 0.00        | 100 ± 0.00  | 74°21'31.4"                  | 31°29'13.3" | 220         |     |
|                |                 |                     | RhB                 | 0.10–0.20   | 0.05      | 0.00        | 100 ± 0.00  |                              |             |             |     |
|                |                 |                     | CV                  | 0.10–0.15   | 0.04      | 0.00        | 100 ± 0.00  |                              |             |             |     |
|                | LH-2            | Sewage              | CIP                 | 0.01–0.02   | 0.01      | 0.00        | 100 ± 0.00  | 74°20'32.6"                  | 31°32'11.3" | 222         |     |
|                |                 |                     | Cr(VI)              | 0.10–0.30   | 0.06      | 0.00        | 100 ± 0.00  |                              |             |             |     |
|                |                 |                     | CR                  | 0.01–0.02   | 0.01      | 0.00        | 100 ± 0.00  |                              |             |             |     |
|                | LH-3            | Canal               | CV                  | 0.30–0.50   | 0.08      | <b>0.01</b> | 100 ± 2.00  | 74°28'35.4"                  | 31°31'15.3" | 218         |     |
|                |                 |                     | Cr(VI)              | 0.10–0.20   | 0.03      | 0.00        | 100 ± 0.00  |                              |             |             |     |
|                | LH-4            | Common reservoir    | CV                  | 0.10–0.15   | 0.03      | 0.00        | 100 ± 0.00  | 74°21'33.2"                  | 31°30'10.3" | 224         |     |
|                |                 |                     | Cr(VI)              | 0.01–0.02   | 0.01      | 0.00        | 100 ± 0.00  |                              |             |             |     |
|                | Faisalabad Zone | F-1                 | Industrial drainage | MB          | 0.40–0.60 | 0.09        | <b>0.01</b> | 100 ± 2.00                   | 73°8'5.85"  | 31°40'1.55" | 188 |
|                |                 |                     |                     | RhB         | 0.10–0.30 | 0.05        | 0.00        | 100 ± 0.00                   |             |             |     |
| CV             |                 |                     |                     | 0.30–0.50   | 0.08      | 0.00        | 100 ± 0.00  |                              |             |             |     |
| F-2            |                 | Sewage              | CIP                 | 0.01–0.02   | 0.01      | 0.00        | 100 ± 0.00  | 73°1'8.88"                   | 31°44'4.60" | 185         |     |
|                |                 |                     | Cr(VI)              | 0.10–0.15   | 0.04      | 0.00        | 100 ± 0.00  |                              |             |             |     |
|                |                 |                     | CR                  | 0.01–0.02   | 0.01      | 0.00        | 100 ± 0.00  |                              |             |             |     |
| F-3            |                 | Canal               | CV                  | 0.10–0.40   | 0.05      | 0.00        | 100 ± 0.00  | 73°2'5.66"                   | 31°47'1.31" | 187         |     |
|                |                 |                     | Cr(VI)              | 0.15–0.25   | 0.05      | 0.00        | 100 ± 0.00  |                              |             |             |     |
| F-4            |                 | Common reservoir    | CV                  | 0.30–0.50   | 0.08      | <b>0.01</b> | 100 ± 1.00  | 73°8'4.32"                   | 31°35'2.41" | 189         |     |
|                |                 |                     | Cr(VI)              | 0.10–0.20   | 0.04      | 0.00        | 100 ± 0.00  |                              |             |             |     |
| Multan Zone    |                 | M-1                 | Industrial drainage | MB          | 0.10–0.15 | 0.03        | 0.00        | 100 ± 0.00                   | 71°35'27.4" | 30°5'26.84" | 128 |
|                |                 |                     |                     | RhB         | 0.01–0.02 | 0.01        | 0.00        | 100 ± 0.00                   |             |             |     |
|                | CV              |                     |                     | 0.10–0.20   | 0.04      | 0.00        | 100 ± 0.00  |                              |             |             |     |
|                | M-2             | Canal               | MB                  | 0.10–0.20   | 0.05      | 0.00        | 100 ± 0.00  | 71°22'42.1"                  | 30°4'82.04" | 120         |     |
|                |                 |                     | RhB                 | 0.30–0.50   | 0.08      | <b>0.01</b> | 100 ± 1.00  |                              |             |             |     |
|                |                 |                     | CV                  | 0.10–0.20   | 0.05      | 0.00        | 100 ± 0.00  |                              |             |             |     |
|                | M-3             | Common reservoir    | MB                  | 0.10–0.15   | 0.03      | 0.00        | 100 ± 0.00  | 71°32'91.5"                  | 30°6'45.40" | 125         |     |
|                |                 |                     | RhB                 | 0.01–0.02   | 0.01      | 0.00        | 100 ± 0.00  |                              |             |             |     |
|                | M-4             | Sewage              | CV                  | 0.10–0.20   | 0.05      | <b>0.01</b> | 100 ± 1.00  | 71°41'29.6"                  | 30°2'44.22" | 122         |     |
|                |                 |                     | CIP                 | 0.01–0.02   | 0.01      | 0.00        | 100 ± 0.00  |                              |             |             |     |
|                | Karachi Zone    | K-1                 | Industrial drainage | MB          | 0.30–0.50 | 0.08        | <b>0.01</b> | 100 ± 1.00                   | 67°12'8.43" | 25°3'10.10" | 128 |
|                |                 |                     |                     | RhB         | 0.10–0.20 | 0.04        | 0.00        | 100 ± 0.00                   |             |             |     |
| CV             |                 |                     |                     | 0.10–0.15   | 0.05      | 0.00        | 100 ± 0.00  |                              |             |             |     |
| K-2            |                 | Canal               | CV                  | 0.20–0.50   | 0.08      | <b>0.01</b> | 100 ± 2.00  | 67°17'25.3"                  | 25°4'12.15" | 132         |     |
|                |                 |                     | CIP                 | 0.10–0.30   | 0.09      | <b>0.01</b> | 100 ± 2.00  |                              |             |             |     |
| K-3            |                 | Sewage              | CV                  | 0.20–0.50   | 0.08      | <b>0.01</b> | 100 ± 1.00  | 67°08'5.33"                  | 25°2'26.08" | 125         |     |
|                |                 |                     | CIP                 | 0.01–0.02   | 0.01      | 0.00        | 100 ± 0.00  |                              |             |             |     |
| K-4            |                 | Common reservoir    | Cr(VI)              | 0.10–0.15   | 0.04      | 0.00        | 100 ± 0.00  | 67°00'4.23"                  | 24°8'39.25" | 120         |     |
|                |                 |                     | CIP                 | 0.01–0.02   | 0.01      | 0.00        | 100 ± 0.00  |                              |             |             |     |
| Islamabad Zone |                 | IB-1                | Industrial drainage | CV          | 0.01–0.03 | 0.01        | 0.00        | 100 ± 0.00                   | 73°10'55.1" | 33°39'36.1" | 555 |
|                |                 |                     |                     | CIP         | 0.01–0.02 | 0.01        | 0.00        | 100 ± 0.00                   |             |             |     |
|                |                 |                     |                     | Cr(VI)      | 0.01–0.02 | 0.01        | 0.00        | 100 ± 0.00                   |             |             |     |
|                | IB-2            | Canal               | CIP                 | 0.01–0.02   | 0.01      | 0.00        | 100 ± 0.00  | 73°05'28.7"                  | 33°45'36.1" | 550         |     |
|                |                 |                     | CV                  | 0.01–0.02   | 0.01      | 0.00        | 100 ± 0.00  |                              |             |             |     |
|                | IB-3            | Sewage              | CV                  | 0.10–0.20   | 0.05      | 0.00        | 100 ± 0.00  | 73°01'82.4"                  | 33°68'36.1" | 548         |     |
|                |                 |                     | CIP                 | 0.01–0.02   | 0.01      | 0.00        | 100 ± 0.00  |                              |             |             |     |
|                | IB-4            | Common reservoir    | CV                  | 0.01–0.02   | 0.01      | 0.00        | 100 ± 0.00  | 73°20'47.6"                  | 33°25'36.1" | 552         |     |
|                |                 |                     | CIP                 | 0.01–0.05   | 0.02      | 0.00        | 100 ± 0.00  |                              |             |             |     |

Where, Abs\* = absorbance before treatment, Abs\*\* = absorbance after treatment.

**Table S8:** Comparative analysis of dye degradation efficiency of previously reported BiVO<sub>4</sub> photocatalysts with Ag-BiVO<sub>4</sub> photocatalysts.

| Materials                             | Dye | % efficiency | Time (min) | (%/min) efficiency | Source        | Ref.         |
|---------------------------------------|-----|--------------|------------|--------------------|---------------|--------------|
| BiVO <sub>4</sub>                     | MB  | 50 %         | 120 min    | 0.41               | UV-Visible    | 2            |
| Paint coated BiVO <sub>4</sub>        | MB  | 72 %         | 240 min    | 0.30               | Visible       | 3            |
| BiVO <sub>4</sub> /TiO <sub>2</sub>   | MB  | 85 %         | 120 min    | 0.70               | Visible       | 4            |
| Polycrystalline BiVO <sub>4</sub>     | CR  | 55 %         | 60 min     | 0.91               | Visible       | 5            |
| m-BiVO <sub>4</sub>                   | RhB | 64.8 %       | 210 min    | 0.31               | Visible       | 6            |
| BiVO <sub>4</sub> (biscuits)          | RhB | 68 %         | 270 min    | 0.25               | Visible       | 7            |
| ZnO/BiVO <sub>4</sub>                 | RhB | 72.7 %       | 150 min    | 0.48               | Visible       | 8            |
| TiO <sub>2</sub> -BiVO <sub>4</sub>   | RhB | 79.3 %       | 300 min    | 0.26               | Sunlight      | 9            |
| BiVO <sub>4</sub> /FeVO <sub>4</sub>  | CV  | 71%          | 60         | 1.18               | 300 W Xe Lamp | 10           |
| BiVO <sub>4</sub> /p-MoS <sub>2</sub> | CV  | 69.2%        | 120        | 0.57               | Visible       | 11           |
| Ag-BiVO <sub>4</sub>                  | MB  | 93.6%        | 60 min     | 1.56               | Sun-light     | Current work |
| Ag-BiVO <sub>4</sub>                  | CR  | 98.6%        | 60 min     | 1.64               | Sun-light     | Current work |
| Ag-BiVO <sub>4</sub>                  | RhB | 65.7%        | 60 min     | 1.09               | Sun-light     | Current work |
| Ag-BiVO <sub>4</sub>                  | CV  | 99.2%        | 60 min     | 1.65               | Sun-light     | Current work |

## References:

1. F. Chen, Q. Yang, Y. Wang, F. Yao, Y. Ma, X. Huang, X. Li, D. Wang, G. Zeng and H. Yu, Efficient construction of bismuth vanadate-based Z-scheme photocatalyst for simultaneous Cr (VI) reduction and ciprofloxacin oxidation under visible light: Kinetics, degradation pathways and mechanism, *Chemical Engineering Journal*, 2018, 348, 157-170.
2. S. Obregón, A. Caballero and G. Colón, Hydrothermal synthesis of BiVO<sub>4</sub>: Structural and morphological influence on the photocatalytic activity, *Applied Catalysis B: Environmental*, 2012, 117-118, 59-66.
3. M. Kumar and R. Vaish, Photocatalytic dye degradation using BiVO<sub>4</sub>-paint composite coatings, *Materials Advances*, 2022, 3, 5796-5806.
4. N. Wetchakun, S. Chainet, S. Phanichphant and K. Wetchakun, Efficient photocatalytic degradation of methylene blue over BiVO<sub>4</sub>/TiO<sub>2</sub> nanocomposites, *Ceramics International*, 2015, 41, 5999-6004.
5. P. Madhusudan, M. V. Kumar, T. Ishigaki, K. Toda, K. Uematsu and M. Sato, Hydrothermal synthesis of meso/macroporous BiVO<sub>4</sub> hierarchical particles and their photocatalytic degradation properties under visible light irradiation, *Environmental Science and Pollution Research*, 2013, 20, 6638-6645.
6. M. M. Sajid, N. Amin, N. A. Shad, S. B. Khan, Y. Javed and Z. Zhang, Hydrothermal fabrication of monoclinic bismuth vanadate (m-BiVO<sub>4</sub>) nanoparticles for photocatalytic degradation of toxic organic dyes, *Materials Science and Engineering: B*, 2019, 242, 83-89.
7. Y. Lu, Y.-S. Luo, H.-M. Xiao and S.-Y. Fu, Novel core-shell structured BiVO<sub>4</sub> hollow spheres with an ultra-high surface area as visible-light-driven catalyst, *CrystEngComm*, 2014, 16, 6059-6065.
8. S. Singh, R. Sharma, G. Joshi and J. K. Pandey, Formation of intermediate band and low recombination rate in ZnO-BiVO<sub>4</sub> heterostructured photocatalyst: Investigation based on experimental and theoretical studies, *Korean Journal of Chemical Engineering*, 2017, 34, 500-510.
9. Y. Wang, N. Lu, M. Luo, L. Fan, K. Zhao, J. Qu, J. Guan and X. Yuan, Enhancement mechanism of fiddlehead-shaped TiO<sub>2</sub>-BiVO<sub>4</sub> type II heterojunction in SPEC towards RhB degradation and detoxification, *Applied Surface Science*, 2019, 463, 234-243.
10. M. M. Sajid, H. Assaedi and H. Zhai, Transition metal vanadates (MVO; M= Bi, Fe, Zn) synthesized by a hydrothermal method for efficient photocatalysis, *Journal of Materials Science: Materials in Electronics*, 2023, 34, 539.
11. P. Singh, S. Sharma and P. Devi, in *Two-Dimensional Materials for Environmental Applications*, Springer, 2023, pp. 299-325.
